# Supplementary material for: The Natural Compound Neobractatin Induces Cell Cycle Arrest by Regulating E2F1 and Gadd45α
Source: Front Oncol. 2019 Jul 17;9:654. doi: 10.3389/fonc.2019.00654 (PMC6653061; doi:10.3389/fonc.2019.00654)
Supplement: Supplementary Table 2 — Kyoto Encyclopedia of Genes and Genomes (KEGG) pathways analysis of upregulated DEGs. GeneRatio value of upregulated DEGs for each KEGG pathway description. [file Table_2.XLSX]

## Sheet: Sheet1
ID	Description	GeneRatio	BgRatio	pvalue	p.adjust	qvalue	geneID	Count
hsa04068	FoxO signaling pathway	22/365	134/7082	1.08628e-06	0.000268312	0.000232122	4616/51422/1027/5564/604/1647/2309/1026/10365/3569/23710/10769/2308/114907/673/5563/3667/1263/7046/4087/5728/5565	22
hsa04668	TNF signaling pathway	17/365	110/7082	4.14e-05	0.0051129	0.00442326	5606/23118/602/5743/182/1326/329/7186/3569/9586/7424/3726/5970/1435/9021/3976/840	17
hsa05202	Transcriptional misregulation in cancer	22/365	180/7082	0.00013037	0.0094309	0.00815884	3207/7030/51804/51274/1027/604/1026/7849/5914/3569/64332/7403/6935/2308/861/221037/5970/1649/64083/5747/2130/648	22
hsa04115	p53 signaling pathway	12/365	69/7082	0.000179492	0.0094309	0.00815884	4616/5054/1647/8795/1026/842/5366/8493/4194/6477/5728/25898	12
hsa04110	Cell cycle	17/365	124/7082	0.000190909	0.0094309	0.00815884	1870/2932/23594/990/4616/1027/1871/1647/1026/25847/7465/7532/993/4087/8555/9088/8318	17
hsa04370	VEGF signaling pathway	10/365	61/7082	0.000998113	0.041089	0.0355468	5743/7422/25759/842/5578/8877/5534/56848/5533/5747	10
hsa04931	Insulin resistance	14/365	109/7082	0.00133452	0.0470895	0.040738	2932/51422/5564/3569/9586/2308/5563/3667/5581/5970/9021/7376/5728/5565	14
